# Supplementary material
Source: Springer Nature journal article supplement (https://www.springermedizin.de/resource/supplementary/12877_2014_1048_MOESM8_ESM.pdf/9440702)

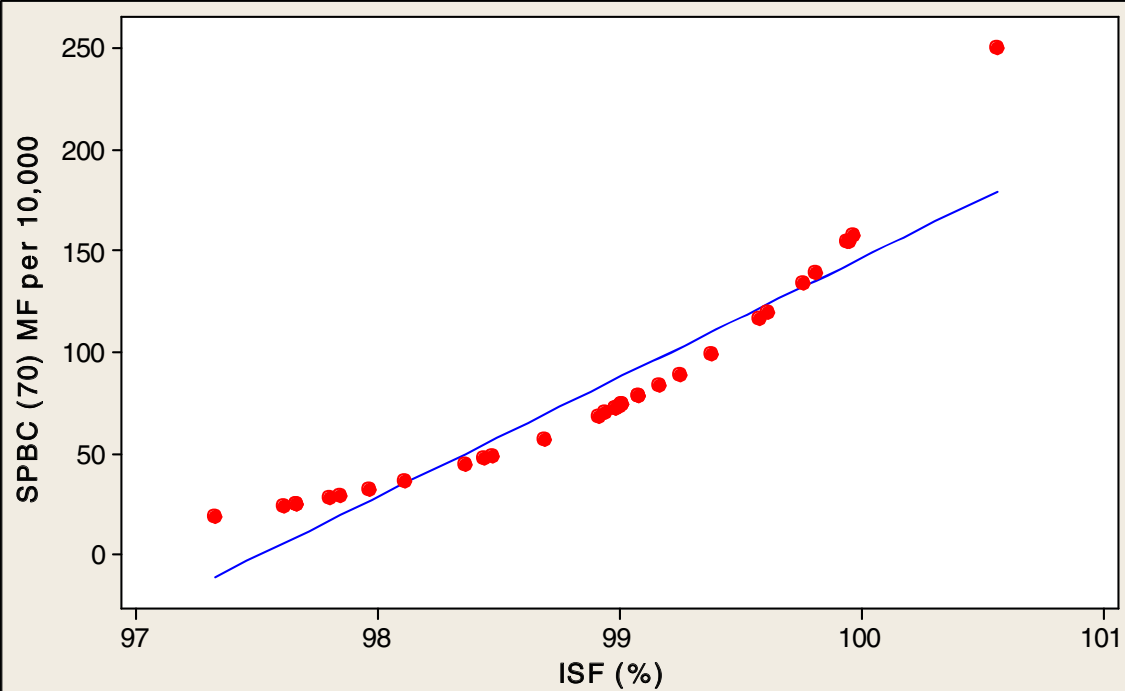

Supplement: MOESM8 [file 9440702]
